# Supplementary material for: A Whole-Genome Sequencing Study Implicates GRAMD1B in Multiple Sclerosis Susceptibility
Source: MDPI journal article supplement (doi:10.3390/genes13122392), 2022-12-16
Supplement: s1 [file s1]

# A Whole-Genome Sequencing Study Implicates GRAMD1B in Multiple Sclerosis Susceptibility

## Supplementary Tables and Figures

**Table S1.** Sequences of primers used for target sequencing. The exon numbers and expected amplicon sizes are shown.

| Exon number | Chr | Sequence primer forward   | Sequence primer reverse  | bp of amplicon |
|-------------|-----|---------------------------|--------------------------|----------------|
| 1           | 11  | GCTCAGAGCTGGTATGAGGTG     | CAGAAGAAGTCTGCCACTG      | 246            |
| 1           | 11  | GAATCTGTCTTTGCCTCCA       | GGTGCCCTATCCCTCCTCTA     | 285            |
| 2           | 11  | ACTGACTGCCTGCCTTTCC       | GGCTCACCACCCCAATATC      | 349            |
| 3           | 11  | ACCACATGGGAAGCATTGAG      | CCAACAAGAAGGGAAACAGG     | 188            |
| 4           | 11  | CTTGCCCTTCCTTCCTAACC      | ACCCTGAGTGCTATGCCG       | 219            |
| 5           | 11  | CAGTGGTTTGGCGAAAATG       | GCAGCTTGCTCAGCCATAG      | 222            |
| 6           | 11  | CCTGACTTACTAATGCCCCAC     | ATGCGATTCAAGAAAGGGC      | 236            |
| 7           | 11  | TTTCTTAAAGGATGGAGGACC     | TGGGAGAATACTATCAGTGGGG   | 268            |
| 8           | 11  | CCTCTGTGCAGAGTCGGG        | TCTTCCTGCAGGCACTCG       | 236            |
| 9           | 11  | GGATGGATAGAAAGGTCTGAGATTC | GAAACGCTGGCCACAGG        | 297            |
| 10          | 11  | TCCCTTTGGAGAATAGATCCAG    | CCACATAGAGATCTCCTTTTAGCC | 325            |
| 11          | 11  | CTCTTGAGGATGTCCCTGG       | TGTAGAGAGGGAAGAAGTGAGG   | 284            |
| 12          | 11  | AAACTTGGATTGGGGAGAGG      | TGCCCTTAATCCTTCAAGACAG   | 256            |
| 12          | 11  | AGGGGAAACTTGGATTGGGGA     | TCCTGACATCTGCCCTTAATCCT  | 271            |
| 13          | 11  | TCCAAGCTTCTTGCTCCTC       | CTCCTCCTTCCCCGTCAG       | 282            |
| 14          | 11  | AATTTCCCTTTTCCCAGCAG      | CCGCAGTGCAGTTTACCATC     | 233            |
| 15          | 11  | TGCAGAGAGTTGCATTGGAG      | GTGTGTGCCTTGGTGTGG       | 341            |
| 16          | 11  | ACCAGCAGTTGTTGGACTTG      | CTTCAAGAGACGAGGGCTGG     | 231            |
| 17          | 11  | TTTCTTGTGCCCTGTCCTT       | GGGGAGGAAAAGAGATGAGG     | 240            |
| 18          | 11  | CAAGGAGACTGGGAGACAGG      | GGGATGTCCTAGGCTCAGGT     | 247            |
| 19          | 11  | GTCCTTTAGGGGTCTGGGAG      | GGAGGGTGGTGATAGAGACG     | 297            |
| 20          | 11  | AATCCCCTAAAAGCGCAGA       | CCTGTTCTGCCTTGTCAT       | 158            |
| 20          | 11  | GGAGCAGCGTTTCTTATGG       | TGGCTCAACATTTCCCTTCT     | 150            |
| 20          | 11  | ATTGACAAGGCAGGAACAGG      | TCAGCTGCTCCACCATAAGA     | 222            |

**Table S2.** Sequences of primers used for qRT-PCR. The target genes and sequences of primers used in qRT-PCR are shown.

|           |         | Sequence (5' to 3')  | Reference               |
|-----------|---------|----------------------|-------------------------|
| hGRAMD1B  | Forward | GTGGACTGGAGGACTACTTC | Designed in-house       |
|           | Reverse | GTTAAGGATGACCAGCAGCA |                         |
| hGAPDH    | Forward | CATGTTCGTCATGGGTGTGA | Designed in-house       |
|           | Reverse | AGTCTTCTGGGTGGCAGTGA |                         |
| rGramd1b  | Forward | GTGGACTGGAGGACTACTTC | Designed in-house       |
|           | Reverse | GTTAAGGATGACCAGCAGCA |                         |
| rFrataxin | Forward | TCACCATTAAGCTGGGCG   | Pelizzoni et al. (2012) |
|           | Reverse | TTCTTCCCGGTCCAGTCATA |                         |
| rRpI18S   | Forward | CAGAAGGACGTGAAGGATGG | Pelizzoni et al. (2012) |
|           | Reverse | CAGTGGTCTTGGTGTGCTGA |                         |

**Table S3.** Demographic and clinical features of MS patients and healthy controls used in the immunohistological characterization. Description of the characteristics of MS patients and healthy controls including the demographic, clinical features, disease duration at time of autopsy, concomitant disease-modifying drugs and the lesion/tissue type that was analysed. Based on the pathological analyses tissues were classified as follows: A=active lesion, I=inactive lesion, NAWM=non-affected white matter, NWM=normal white-matter. IFN 1 $\beta$ : Interferon  $\beta$ -1 a; GA: Glatiramer Acetate.

| Patient | Age | Gender | Diagnosis | Tissue Analyzed                                   | Tissue Classification | Disease Duration (yrs) | Disease-modifying drugs        |
|---------|-----|--------|-----------|---------------------------------------------------|-----------------------|------------------------|--------------------------------|
| MS1     | 50  | Female | SPMS      | Pons                                              | I                     | 13                     | Dalfampridine, Baclofen        |
| MS2     | 54  | Female | RRMS      | Medulla                                           | I, NAWM               | 17                     | Steroids, IFN 1 $\beta$ , GA   |
| MS3     | 45  | Female | SPMS      | Pons                                              | A, NAWM               | 7                      | Steroids, Phenytoin, Lorazepam |
| MS4     | 45  | Female | PPMS      | Pons, monocytes/myeloid monocytes/myeloid Medulla | A, NAWM               | 16                     | Baclofen                       |
| C1      | 41  | Male   | ---       | Pons                                              | NWM                   | ---                    | ---                            |
| C2      | 69  | Female | ---       | Occipital Cerebrum                                | NWM                   | ---                    | ---                            |
| C3      | 81  | Male   | ---       | Pons                                              | NWM                   | ---                    | ---                            |

**Table S4.** Variants emerged from Canadian MS families. Genomic coordinates are given from NCBI Build 37.1; RNA and protein positions are based on GenBank RefSeq NM\_020716.2; dbSNP IDs are provided from build 149. Exome Aggregation Consortium (ExAC) frequencies were obtained from European non-Finnish samples, with an asterisk indicating low quality data. Damage prediction on protein function and evolutionary conservation were calculated using Combined Annotation Dependent Depletion (CADD v1.3) phred-scale and Genomic Evolution Rate Profiling (GERP). Pos: position; nt: nucleotide.

| pos          | nt change | cDNA change | Amino Acid change | dbSNP           | CADD | GERP | Genotypes | MS patients (MAF) | Controls (MAF)    | ExAC (MAF)           |
|--------------|-----------|-------------|-------------------|-----------------|------|------|-----------|-------------------|-------------------|----------------------|
| 11:123479372 | G/A       | c.1090G>A   | p.V364I           | rs20054034<br>2 | 23.1 | 5.52 | GG/GA     | 9/2421<br>(0.19%) | 3/1061<br>(0.14%) | 70/7402<br>(0.46%)*  |
| 11:123484247 | C/T       | c.1679C>T   | p.T560M           | rs19960453<br>4 | 23.8 | 4.37 | CC/CT     | 5/2426<br>(0.10%) | 1/1062<br>(0.05%) | 15/322163<br>(0.02%) |

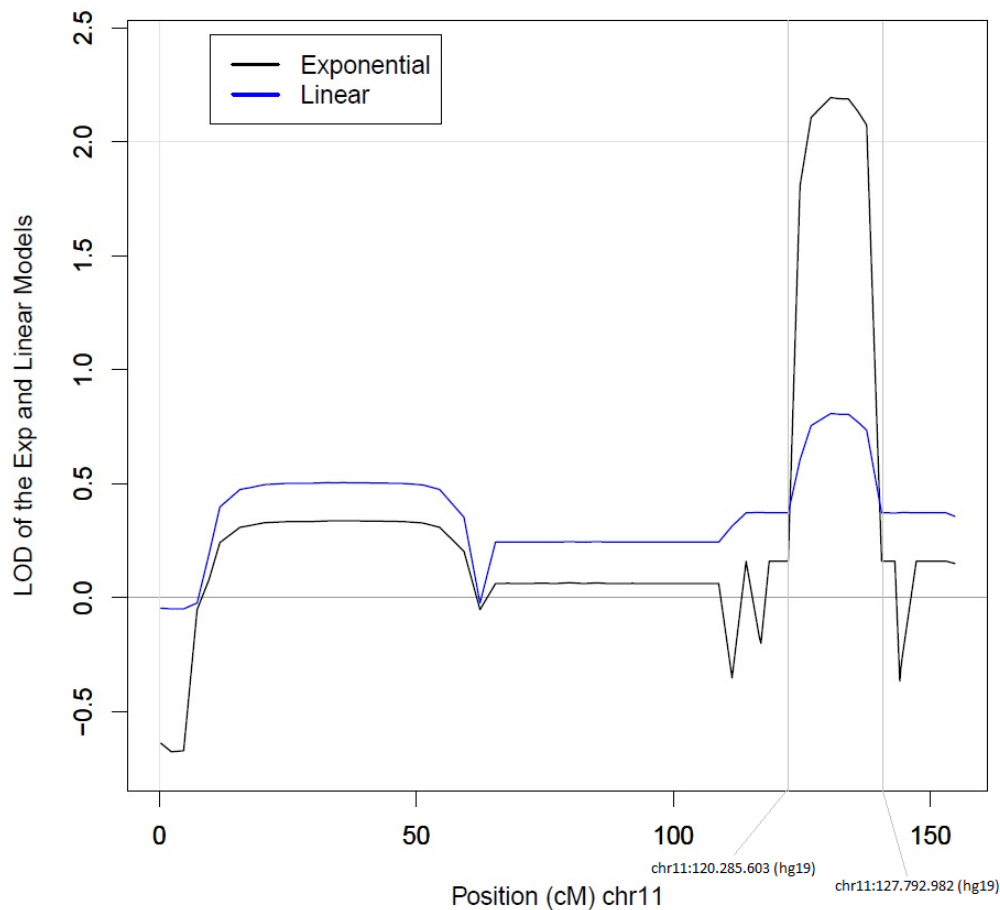

**Figure S1.** Linkage peak identified in chromosome 11q23. The peak identified in the linkage analysis is shown. The start and end positions of the peak are indicated on the x-axis. A linear and exponential model has been tested according to Kong and Cox.

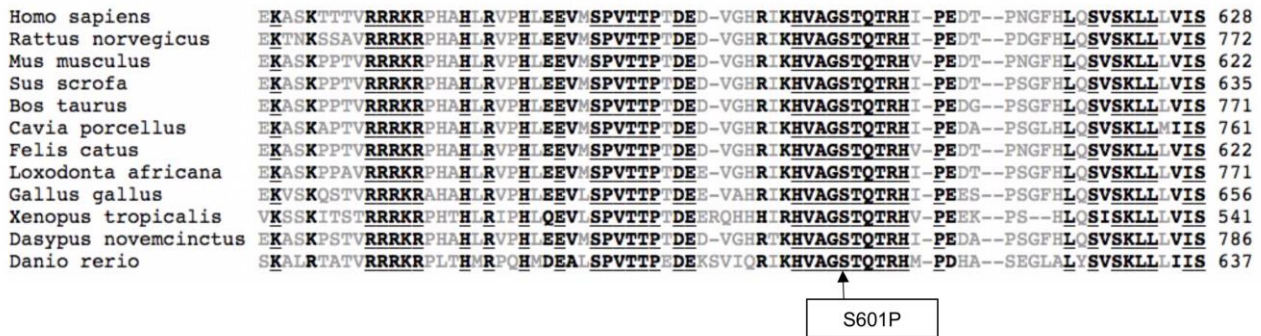

**Figure S2.** Conservation analysis of S601P. Multiple sequence alignment of GRAMD1B among vertebrates around p.S601P mutations (indicated with arrows) showed conserved amino acid change across species from zebrafish to humans.

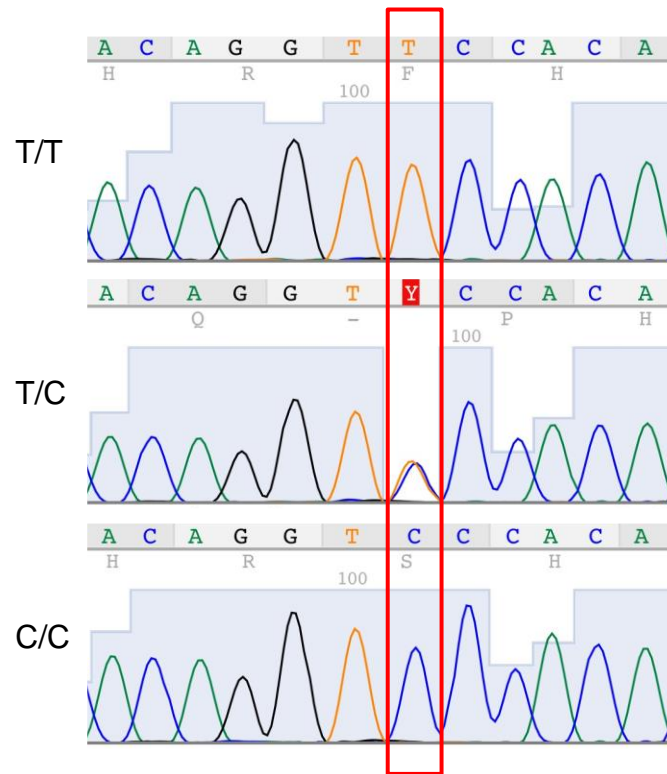

**Figure S3.** Sanger validation of the *c.1801T>C* (p.S601P) variant. Representative example of the electropherograms showing the presence or absence of the *c.1801T>C* (p.S601P) variant in a multiple sclerosis affected homozygous for wild type (subject: II-3), heterozygous (subject: III-5) and homozygous for the mutant allele (subject: II-6).

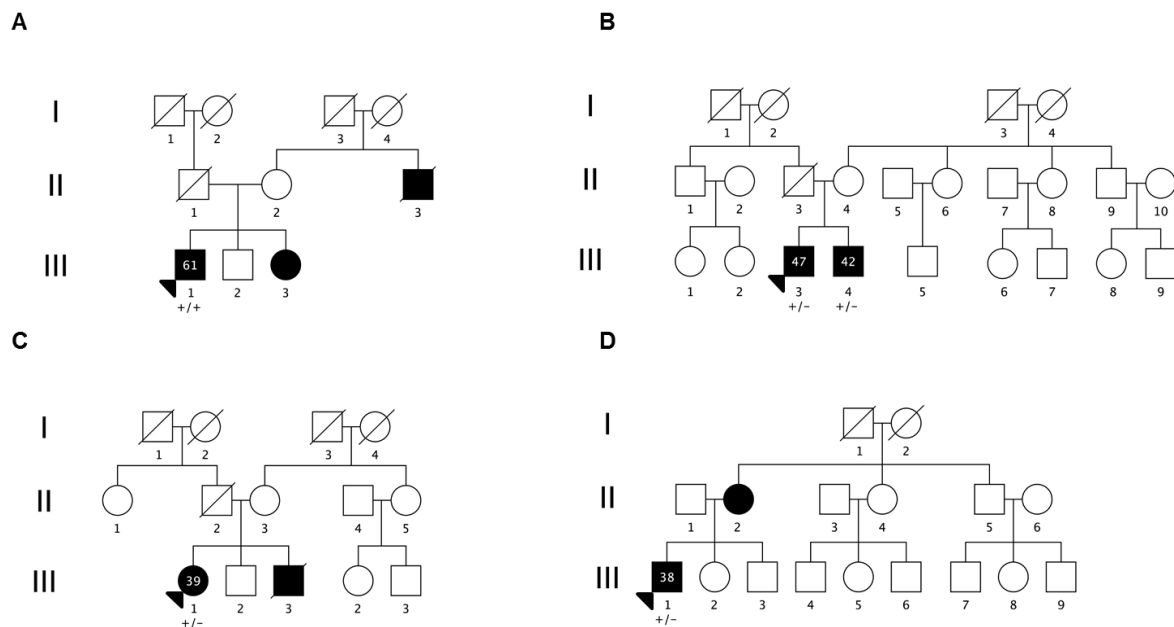

**Figure S4.** Pedigrees of the familial MS cases in which additional *GRAMD1B* rare variants have been identified. The pedigrees of MS multiplex families in which we found additional *GRAMD1B* rare variants are plotted. Specifically, in family A the proband carries the rs118067934 variant at homozygous state, in family B the two subjects affected by MS carry the rs140366389 variant at heterozygous state, in family C the proband is a carrier of the rs755488531 variant at heterozygous state, whereas in family D the proband is a carrier of the rs769527838 variant at heterozygous state. For an additional family, where the proband carries the rs118067934 variant, we did not have enough information to reconstruct the pedigree. The numbers reported inside circles and squares indicate the age of the subject at sampling. Squares represent men, circles represent women; slash, deceased subject. Black-filled symbols represent individuals diagnosed with MS. Small arrowhead, proband. +/-: heterozygous individuals for mutated allele; -/-: homozygous individuals for wild-type allele; +/-: heterozygous individuals.

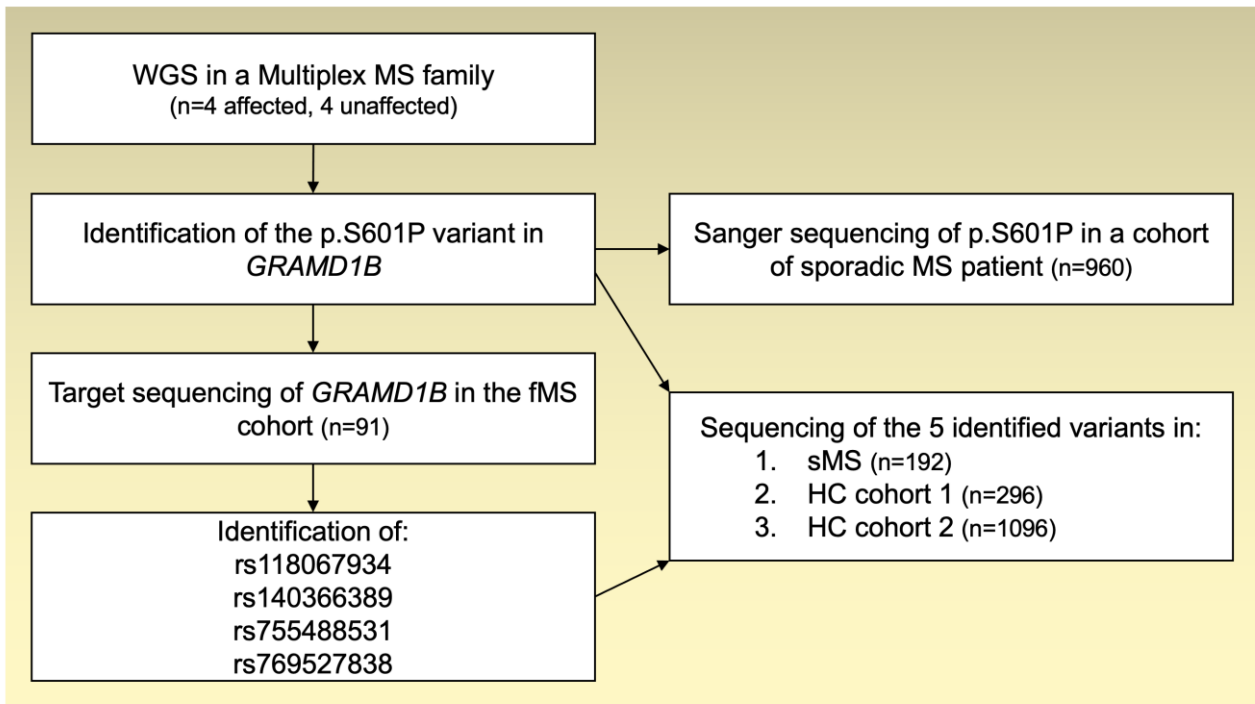

**Figure S5. Summary flowchart of the different case-control data sets and the variants tested.** The flowchart describes the different steps of the variant identification in *GRAMD1B* gene. Specifically, whole genome sequencing and subsequent variants filtering were performed in the described multiplex MS family leading to the identification of the p.S601P variant in *GRAMD1B*. Then, the presence of the variant was tested in a cohort of 960 sporadic MS cases: none of the MS patients carried the p.S601P variant. A targeted sequencing approach was applied to re-sequence exons and exon-intron boundaries of *GRAMD1B* in 91 unrelated MS probands with at least one first or second degree relative affected by MS (fMS); leading to the selection of additional 4 rare variants in *GRAMD1B*. Finally, we then tested the presence of the identified 5 rare variants in an additional cohort of 192 sporadic MS cases (sMS) and 296 HC subjects (HC cohort 1), as well as in 1096 HC Italian subjects from the Italian Reference Genome v1 (HC cohort 2).

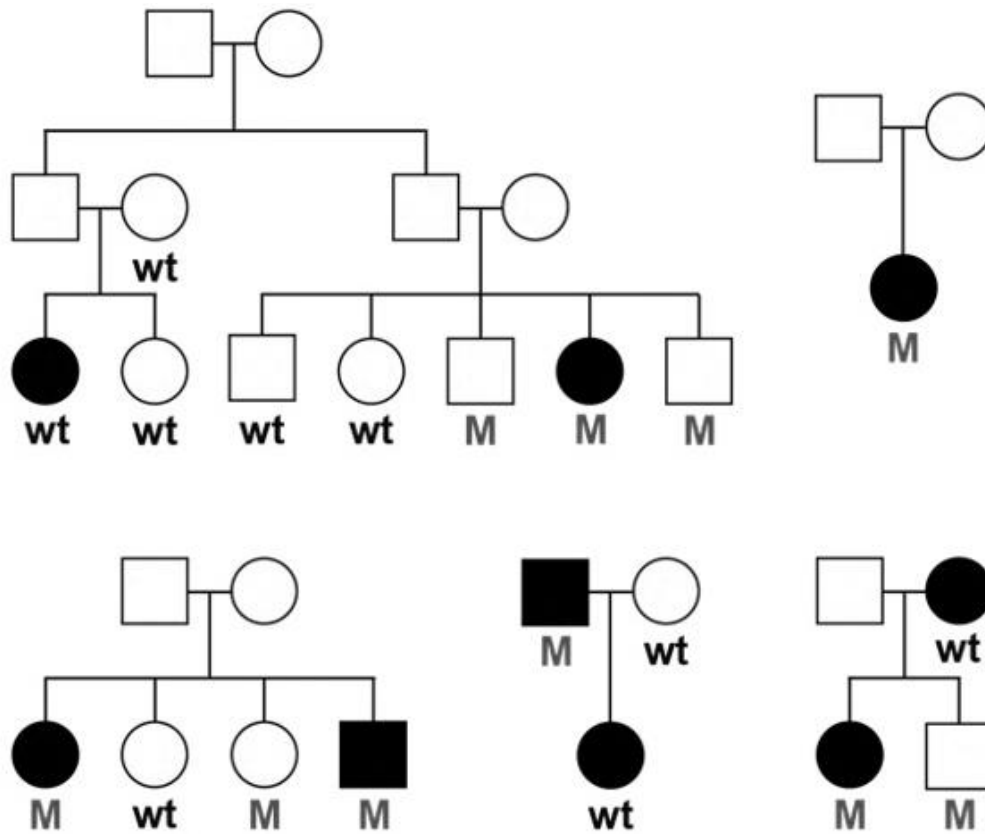

**Figure S6.** Pedigrees of the additional Canadian familial MS cases with included the information about the segregation of p.T560M. Cases are indicated in black. wt: wild-type, M: carrier of mutation.

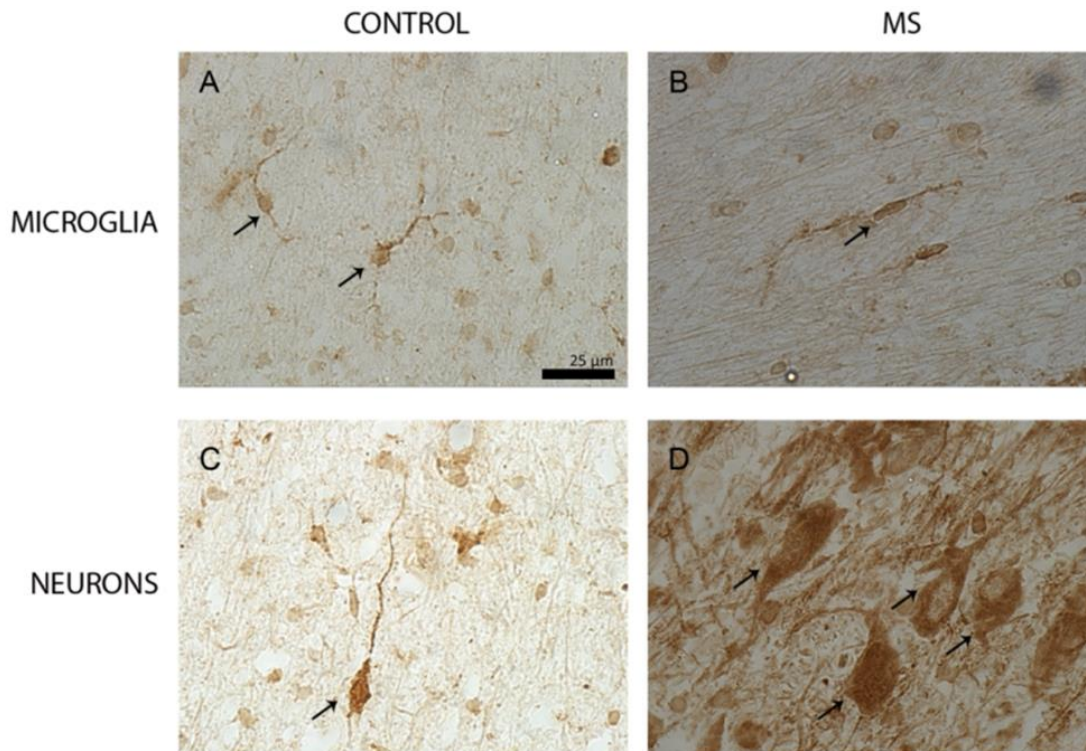

**Figure S7.** GRAMD1B expression in microglia and neurons in brains of MS patients and healthy controls. A-B: Representative DAB (3,3-diaminobenzidine) immunostaining with the GRAMD1B antibody in normal white matter (NWM) of a control subject (CTR) and in the normal appearing white matter (NAWM) of a MS patient respectively. Staining corresponds to microglia cells. C-D: Positive DAB staining in subcortical neurons of a control and in the pons of a MS patient respectively. Black arrows indicate the cells of interest.



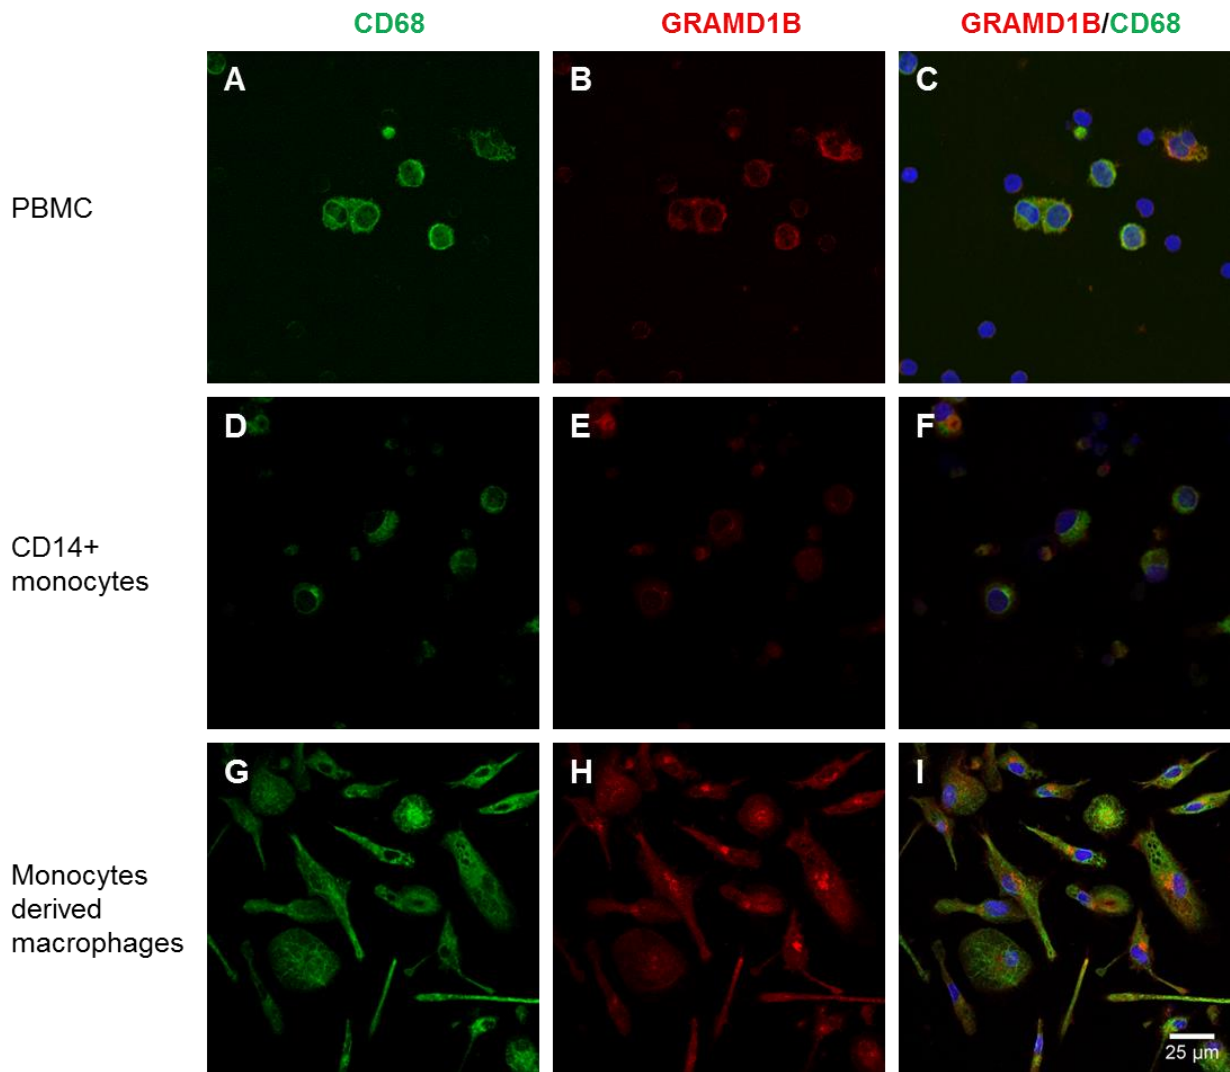

**Figure S8.** GRAMD1B expression in primary human immune cells isolated from peripheral blood of healthy controls. Immunocytochemistry of GRAMD1B in PBMC (A-C), CD14<sup>+</sup> monocytes (D-F) and macrophages/myeloid (CD68<sup>+</sup>) cells (G-I). GRAMD1B staining is shown in red, and the corresponding cell marker CD68 for monocytes and macrophages/myeloid cells is shown in green.
